# Supplementary material
Source: ML conference proceedings conference paper supplement (https://openaccess.thecvf.com/content/ACCV2020/html/Yu_Encode_the_Unseen_ACCV_2020_paper.html)

# **Encode the Unseen: Predictive Video Hashing for Scalable Mid-Stream retrieval**

**Tong Yu, Nicolas Padoy**

*ICube, University of Strasbourg, CNRS, IHU Strasbourg, France*

**ACCV 2020 - supplementary material**

**Mean Average Precision at K (mAP@K)  
for all retrieval approaches compared in the  
manuscript**

**Results for FCVID**

96 bits, SSTH-RT

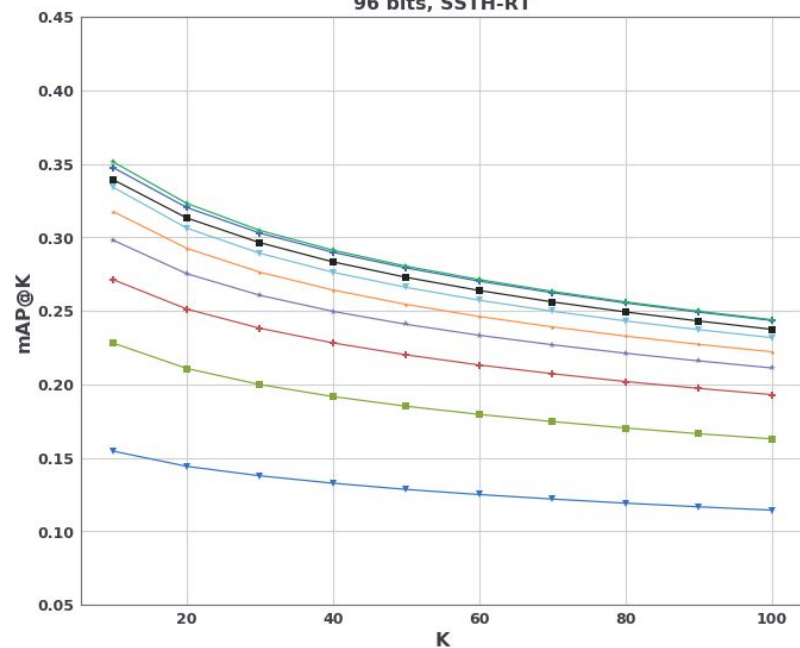

128 bits, SSTH-RT

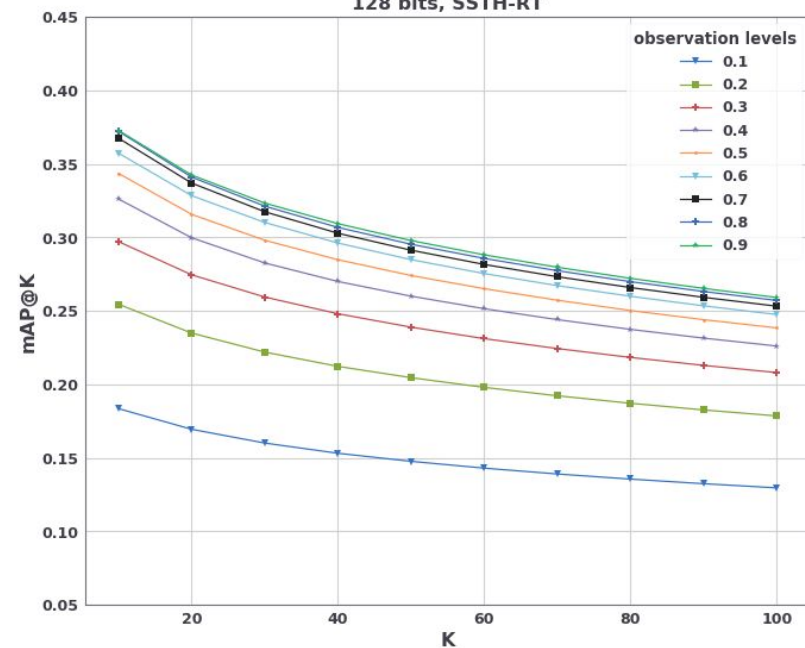

192 bits, SSTH-RT

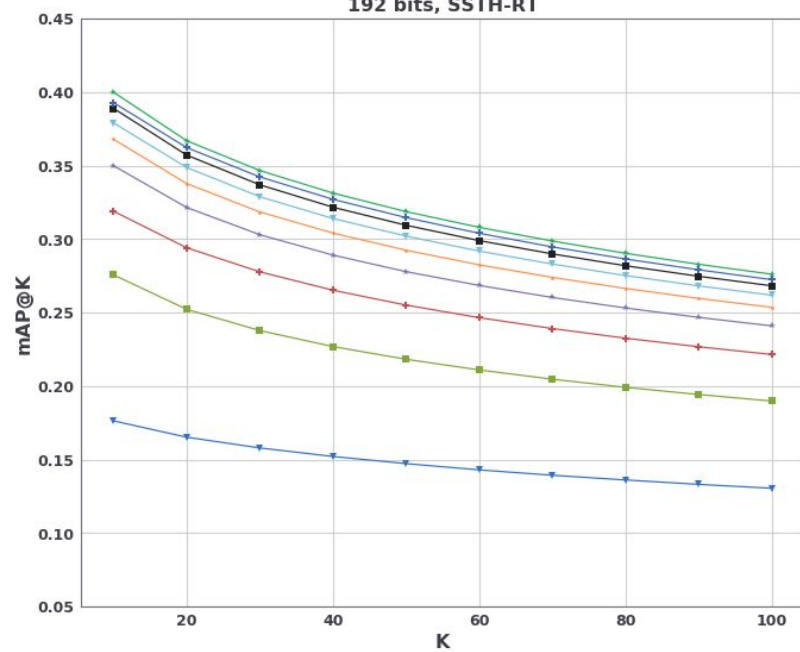

256 bits, SSTH-RT

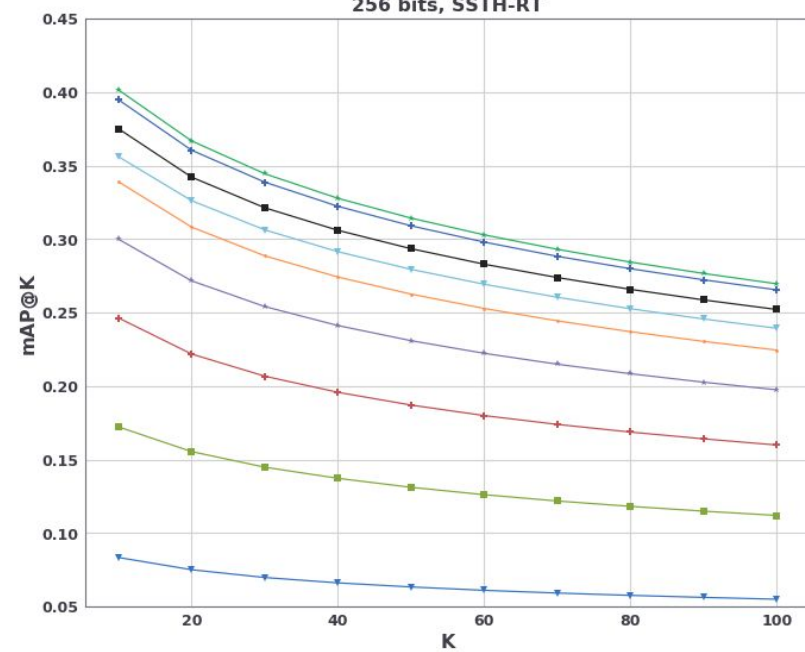

96 bits, SSTH-RT+

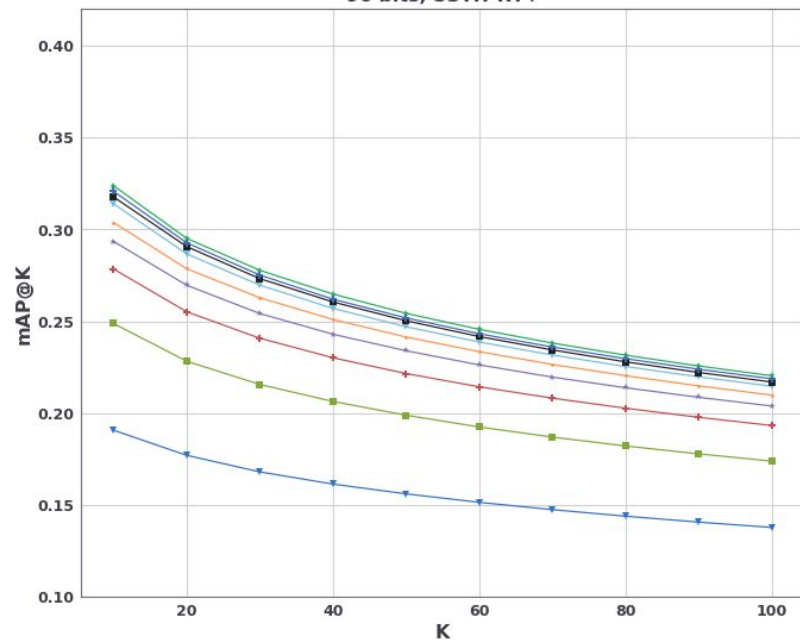

128 bits, SSTH-RT+

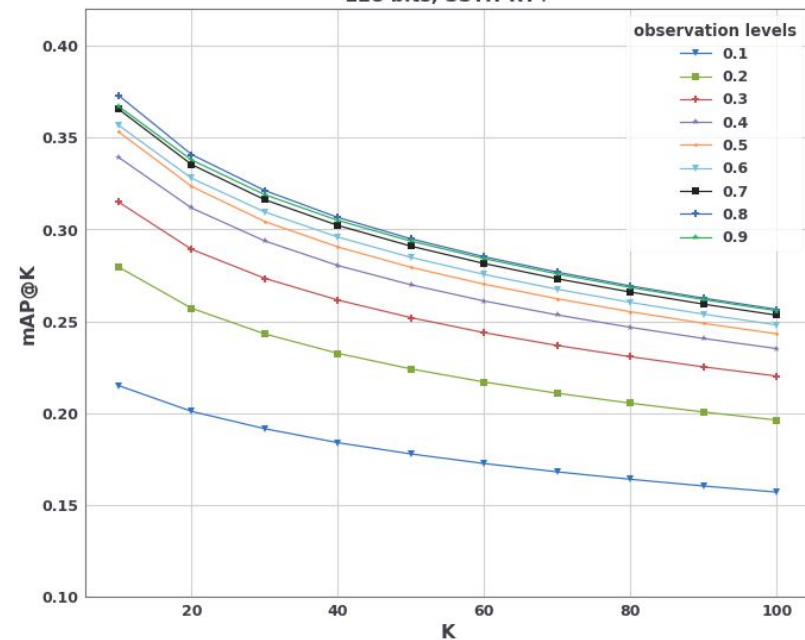

192 bits, SSTH-RT+

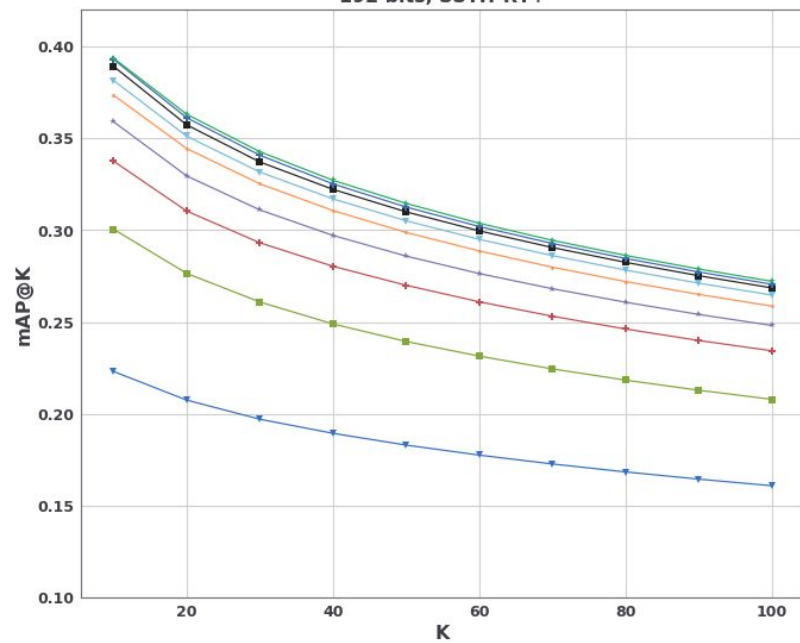

256 bits, SSTH-RT+

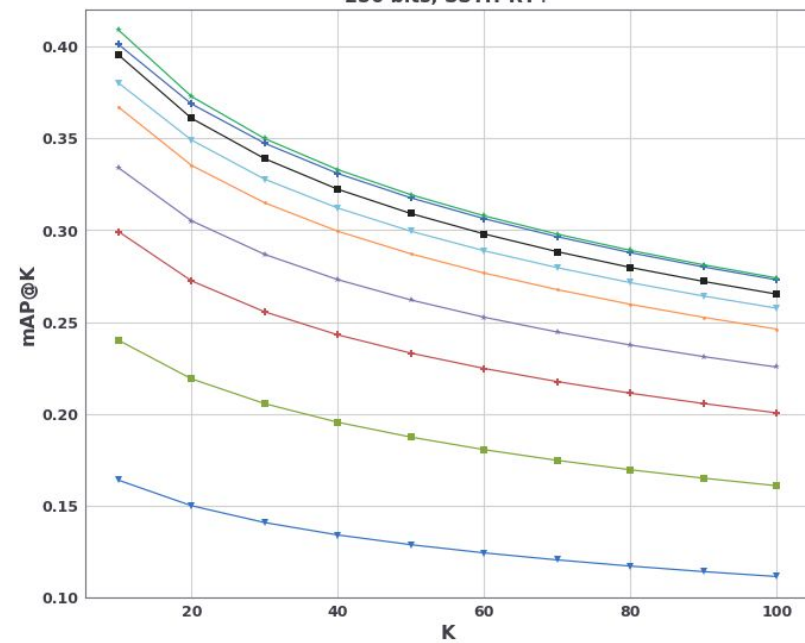

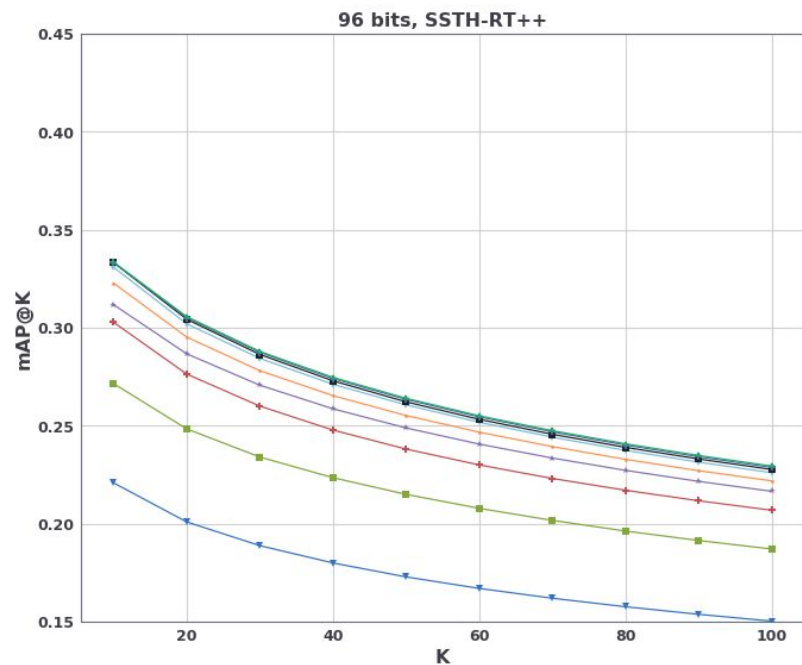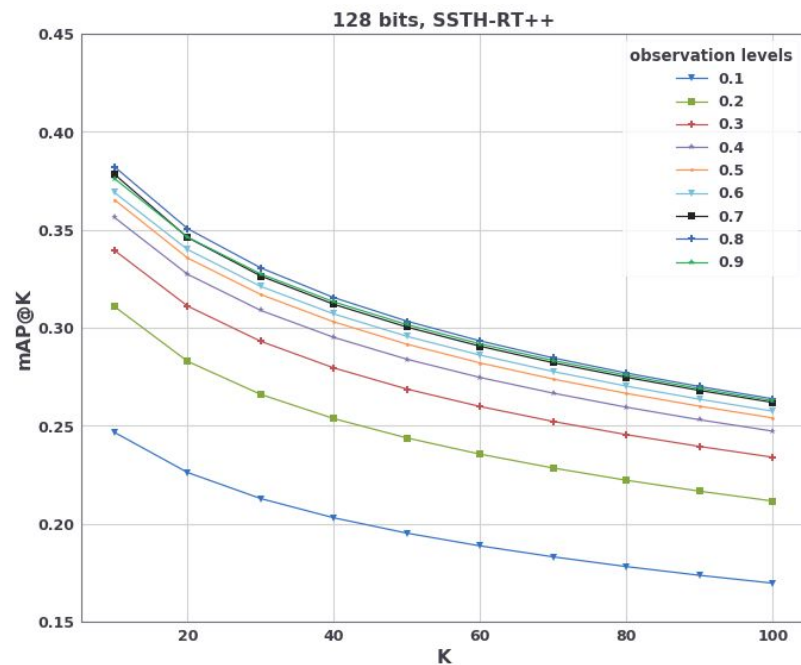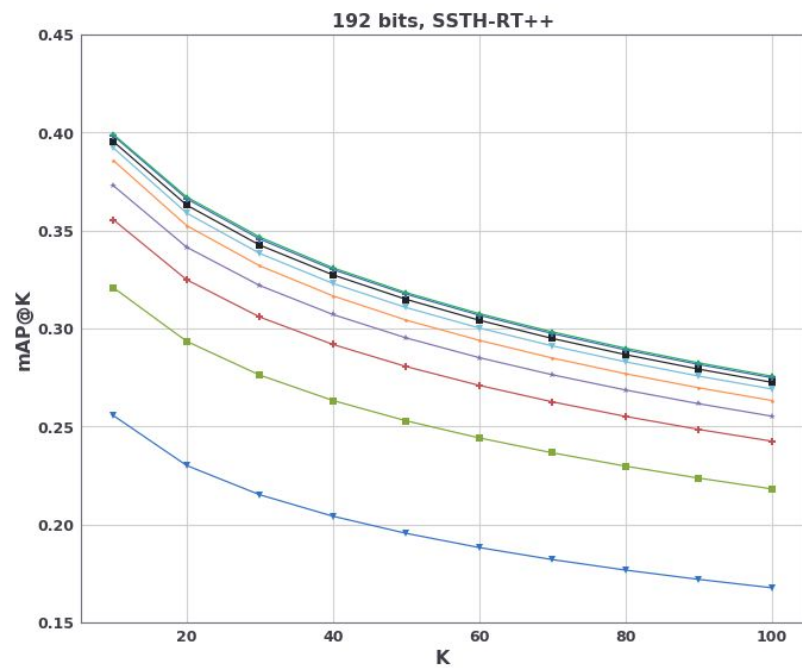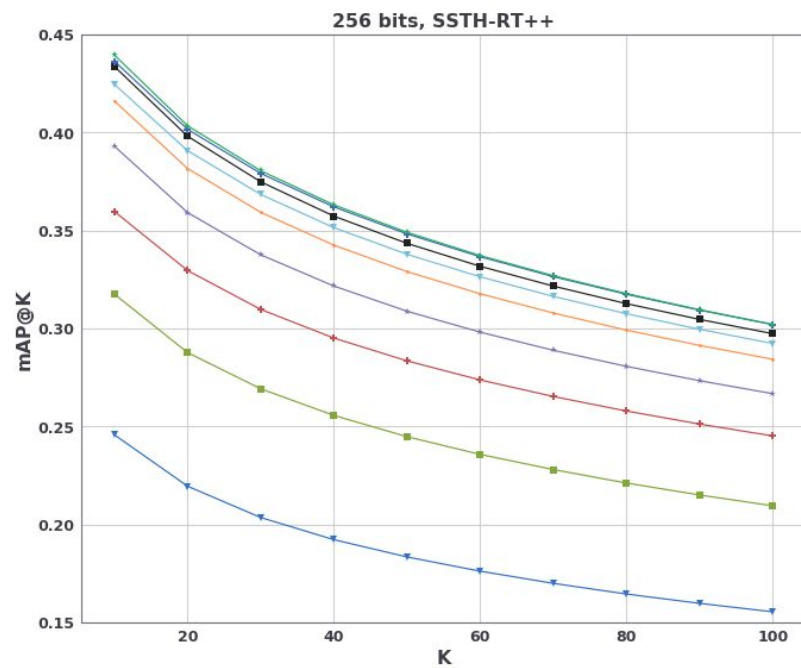

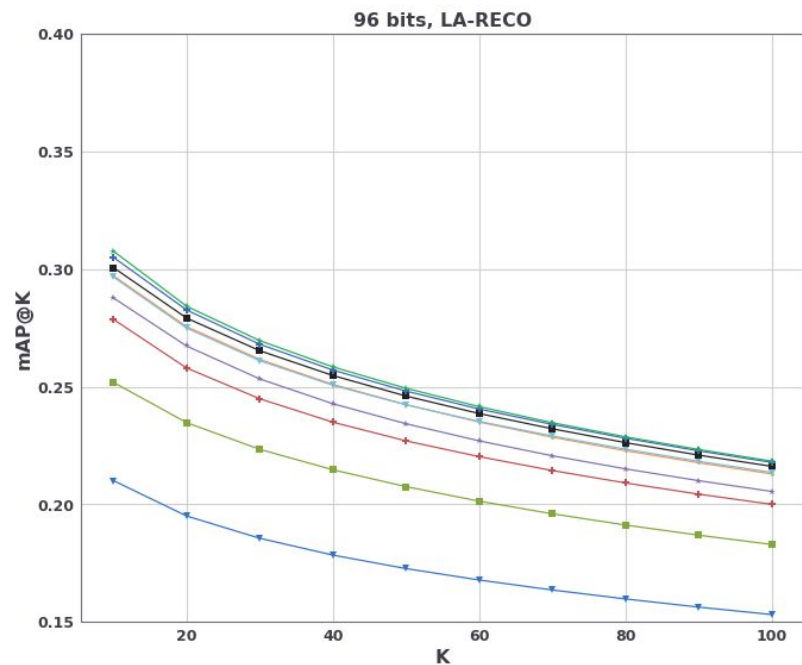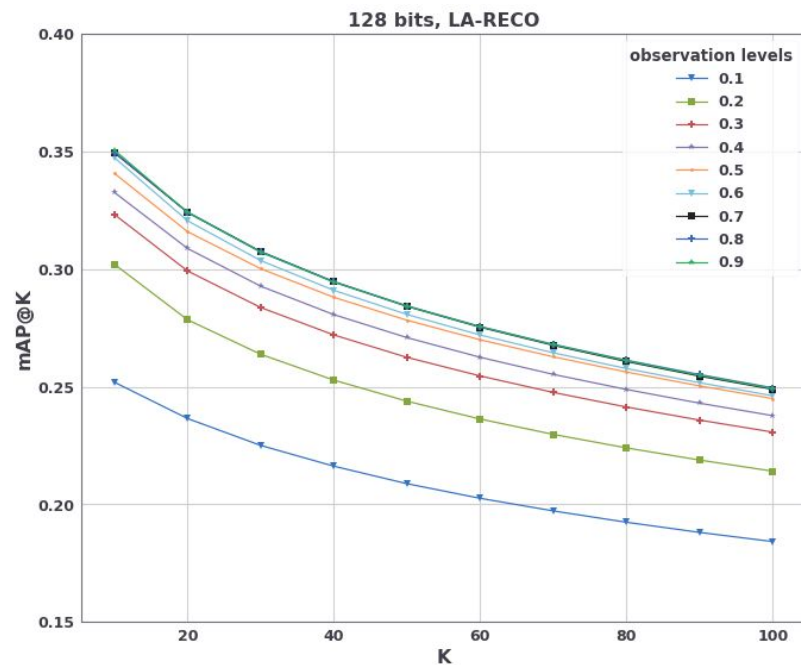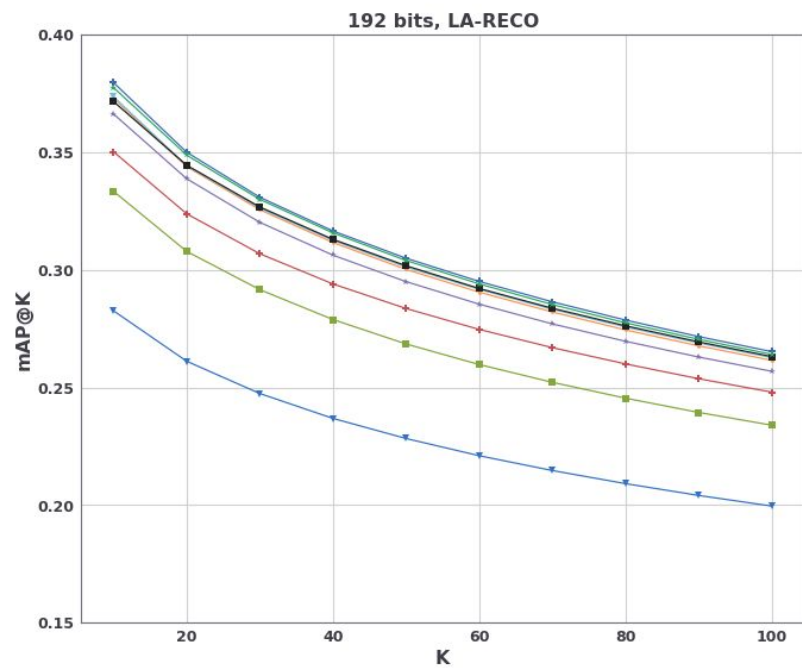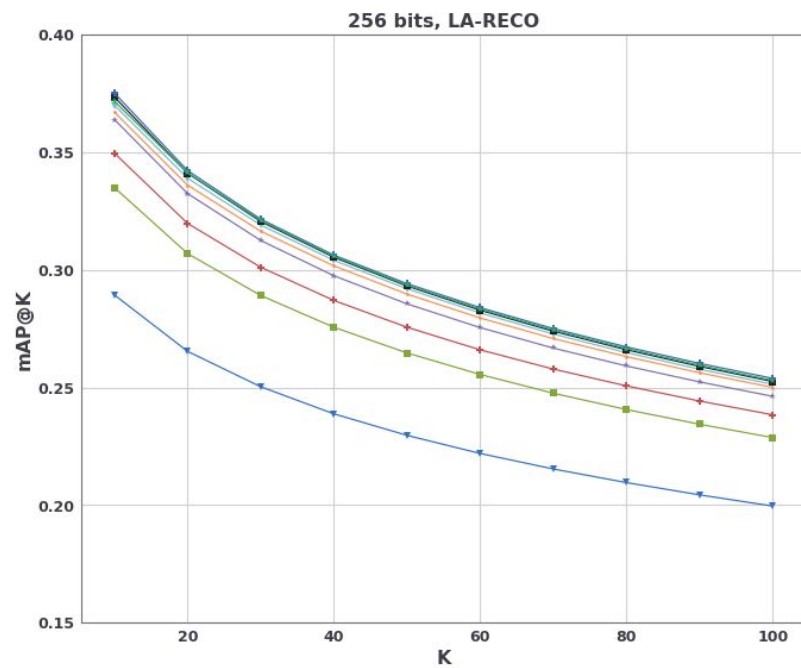

96 bits, LA-CODE

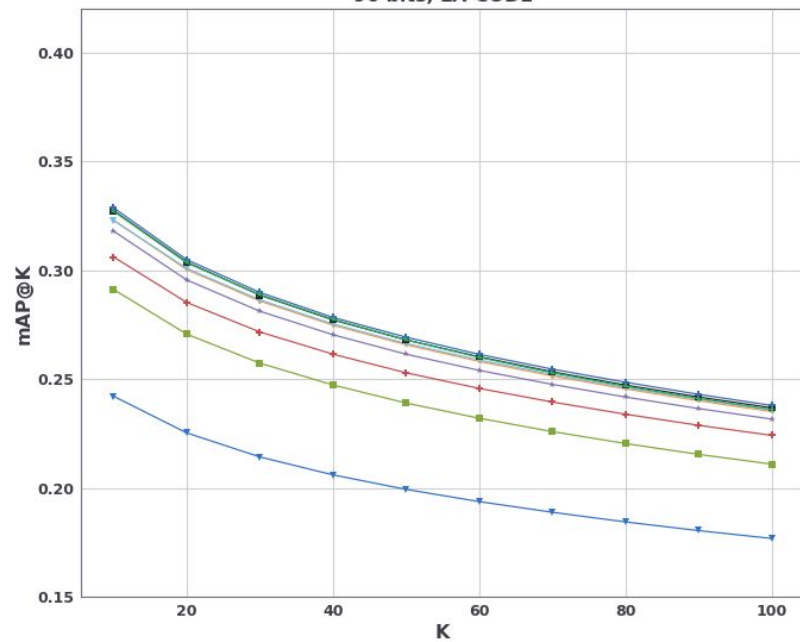

128 bits, LA-CODE

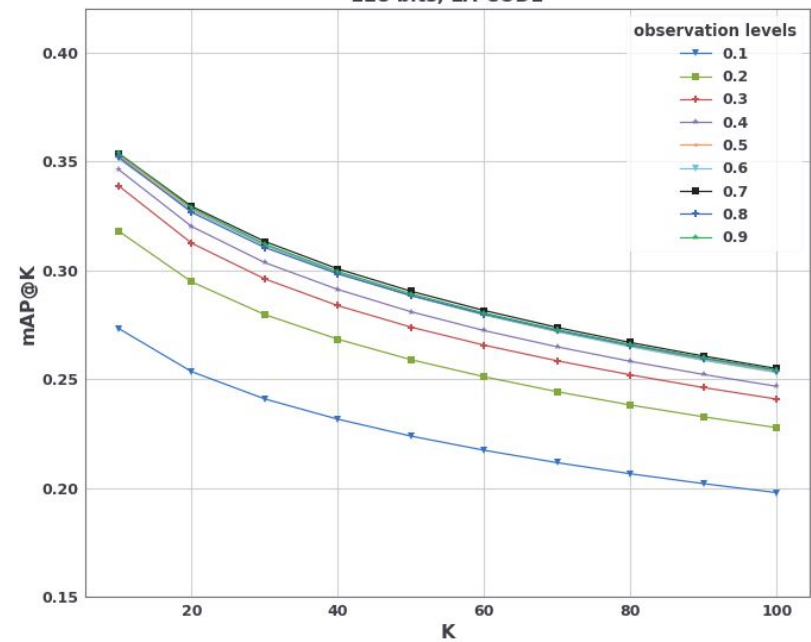

192 bits, LA-CODE

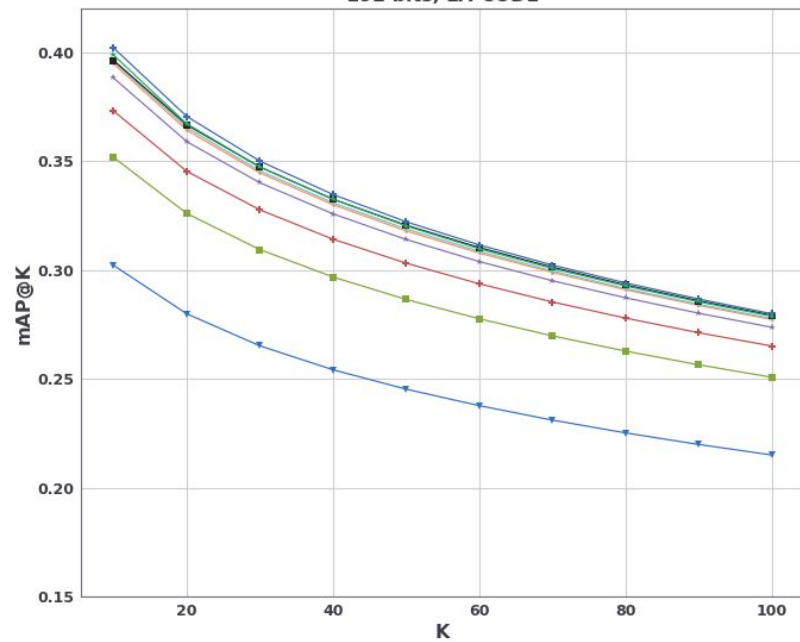

256 bits, LA-CODE

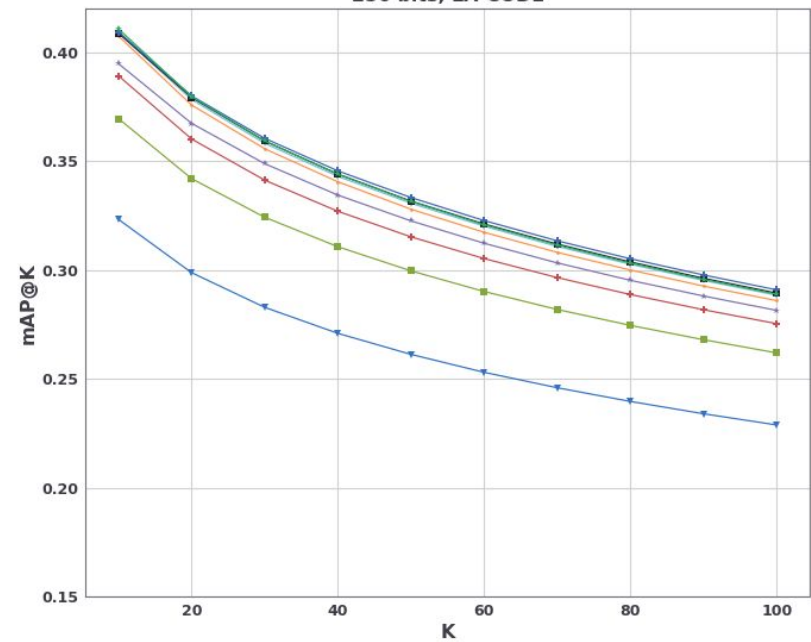

**Mean Average Precision at K (mAP@K)  
for all retrieval approaches compared in the  
manuscript**

**Results for ActivityNet**

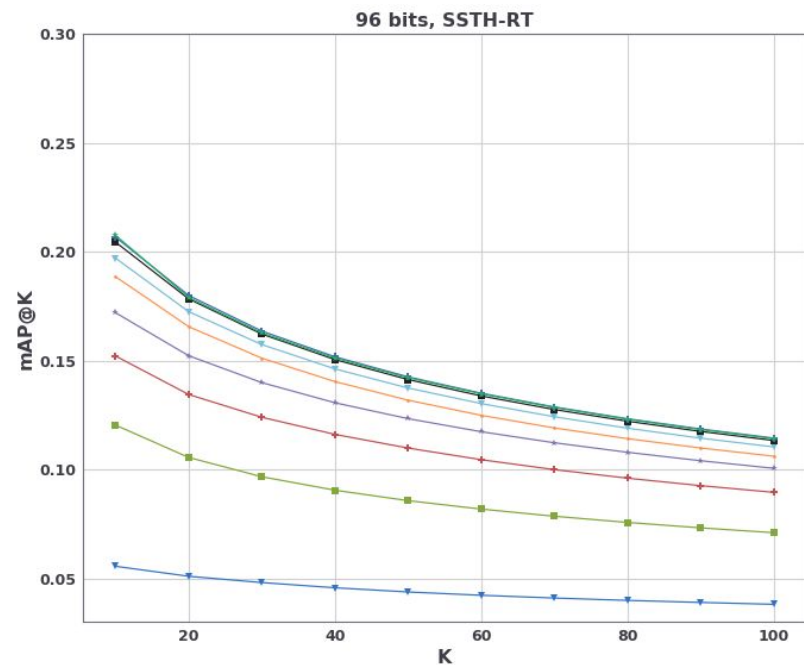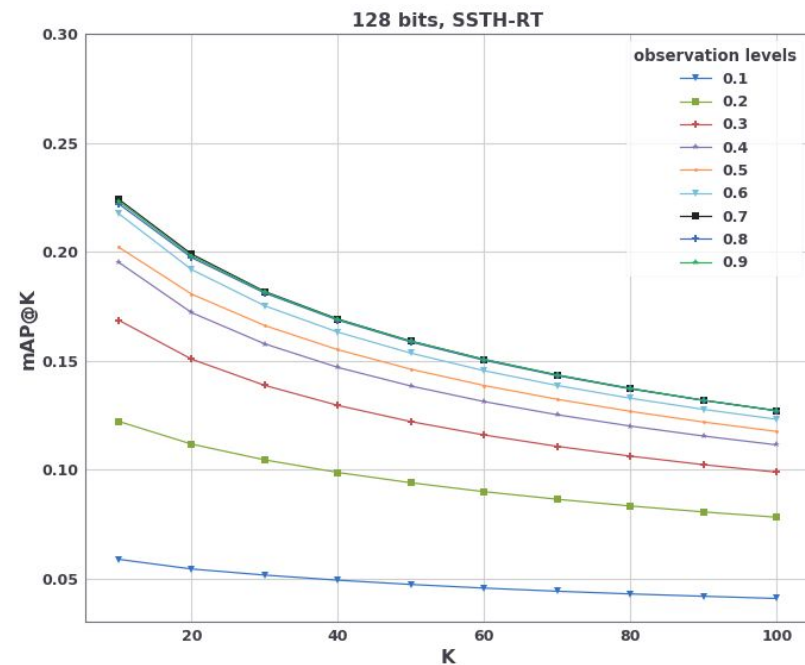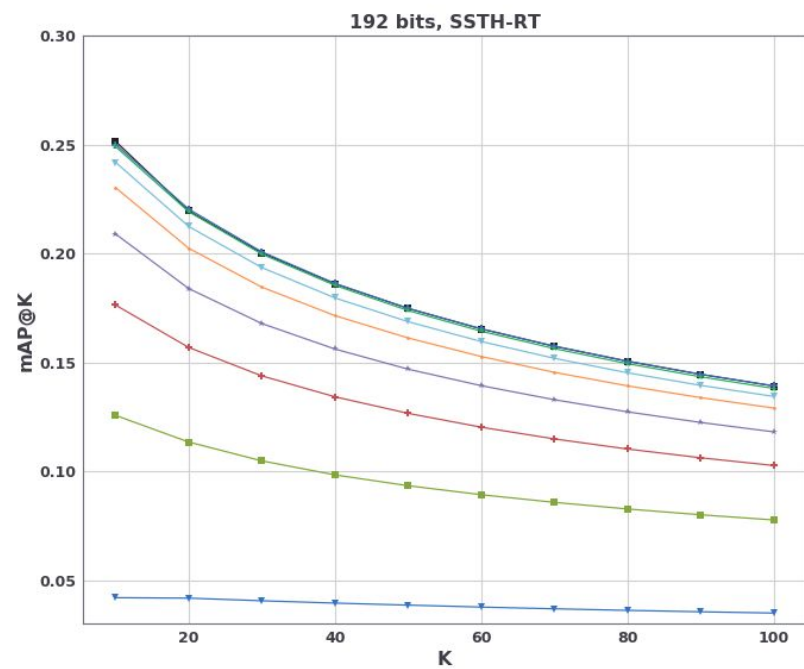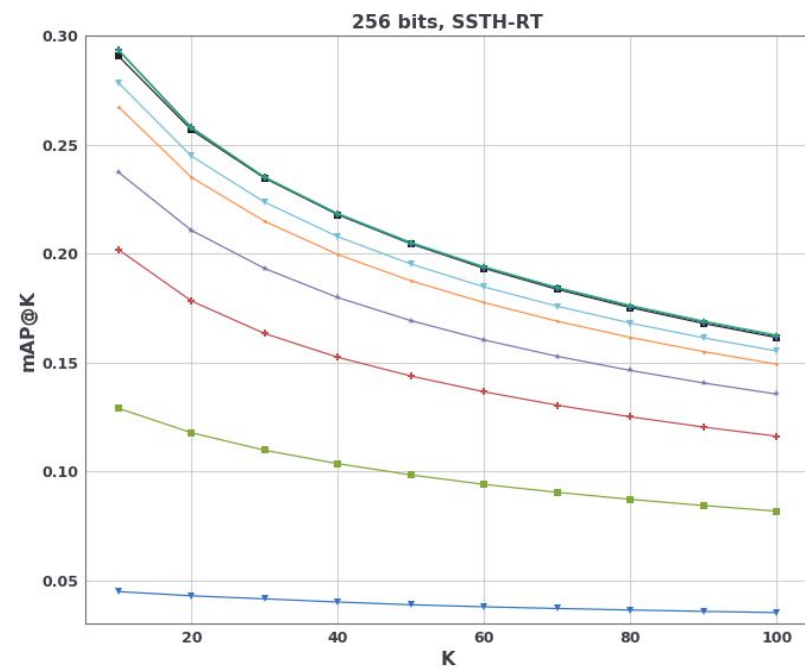

96 bits, SSTH-RT+

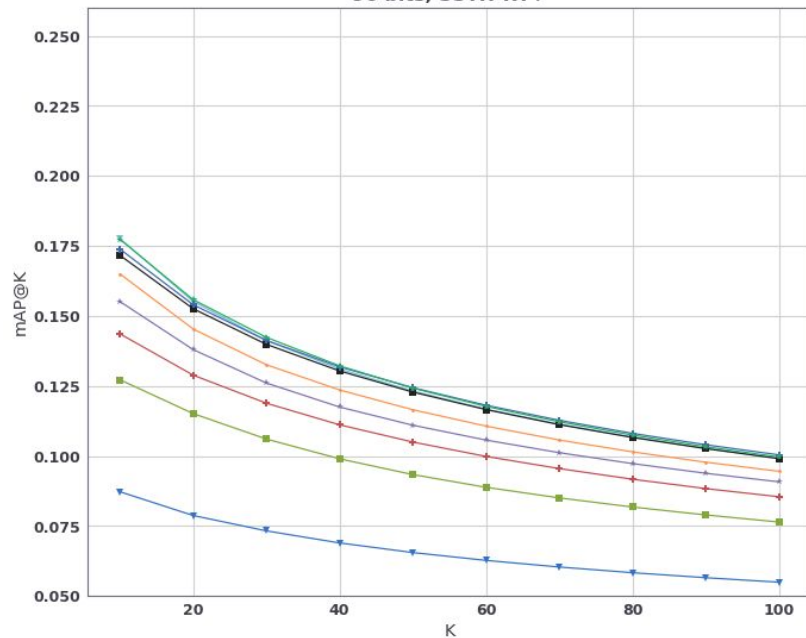

128 bits, SSTH-RT+

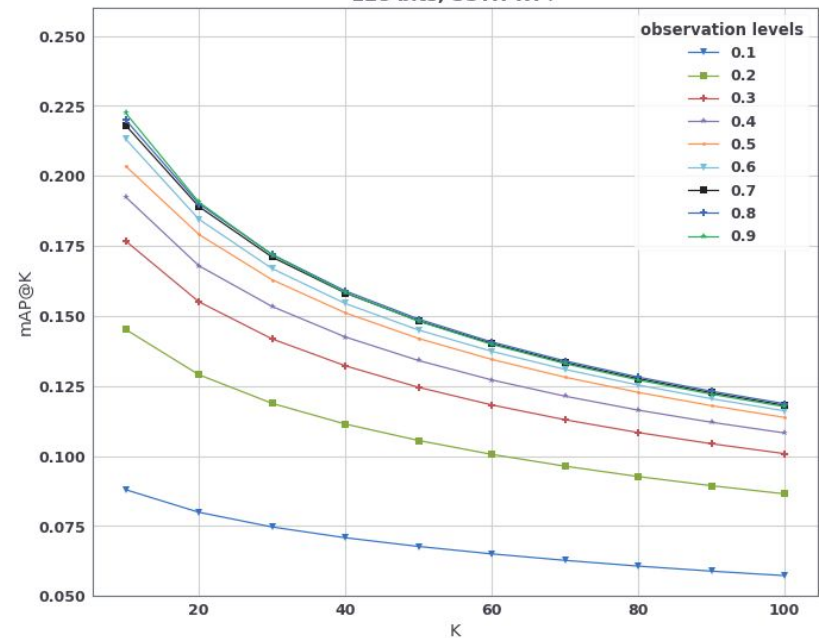

192 bits, SSTH-RT+

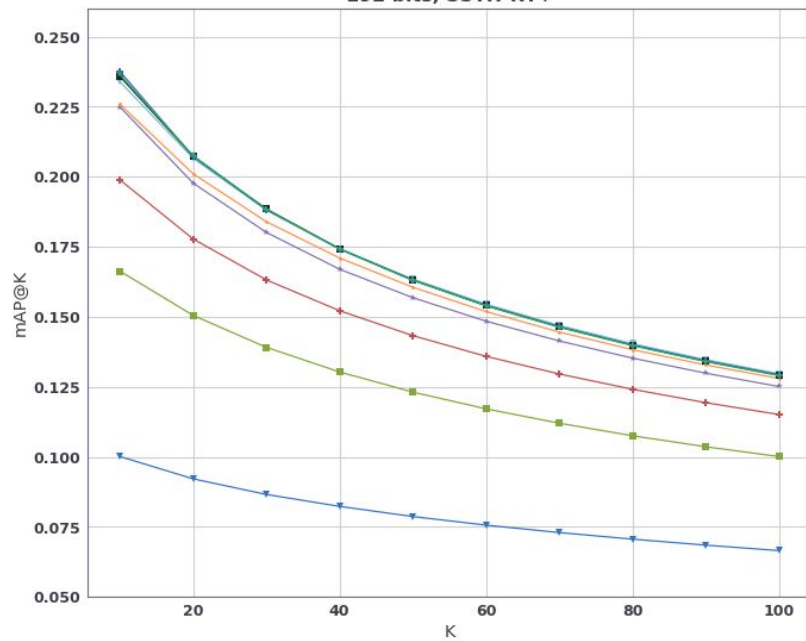

256 bits, SSTH-RT+

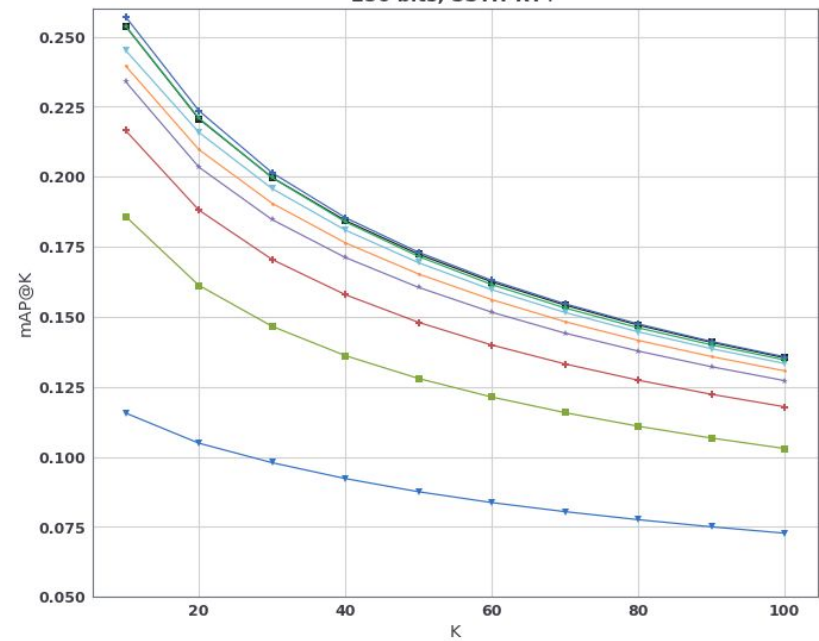

96 bits, SSTH-RT++

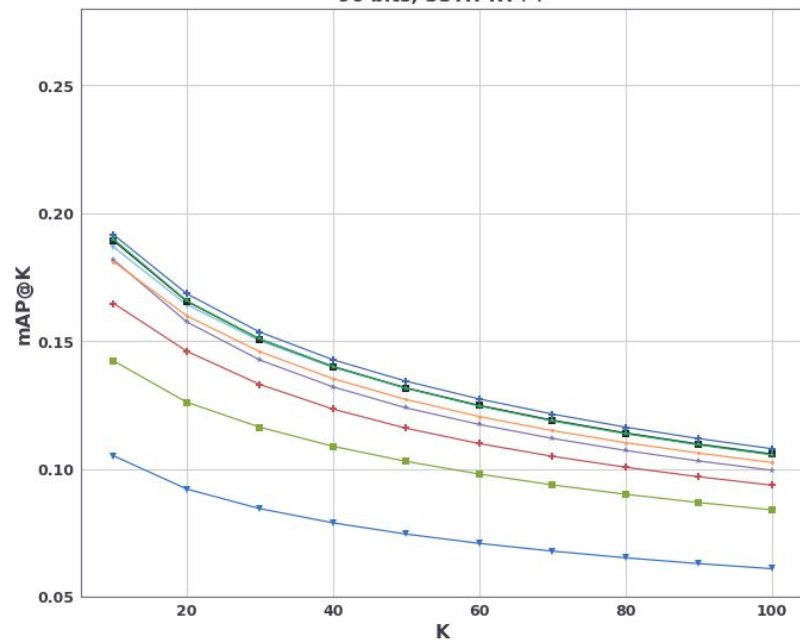

128 bits, SSTH-RT++

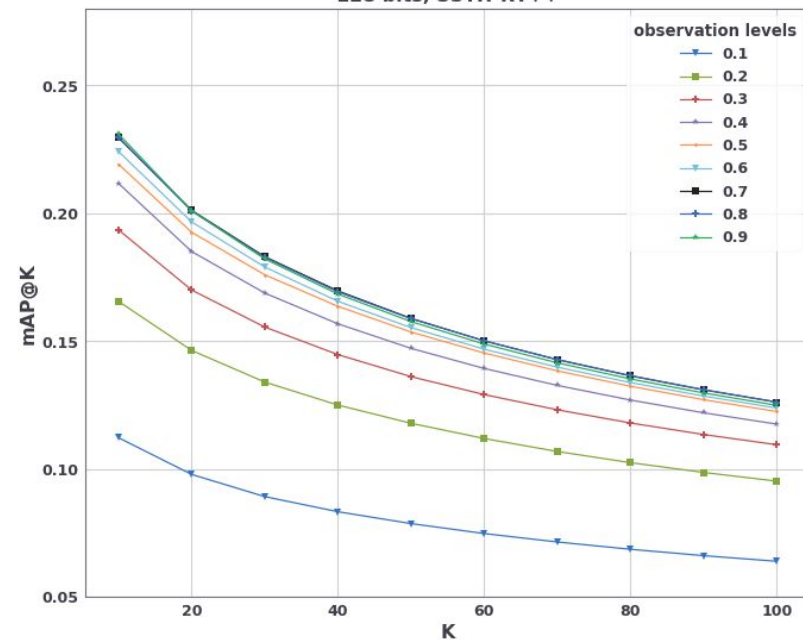

192 bits, SSTH-RT++

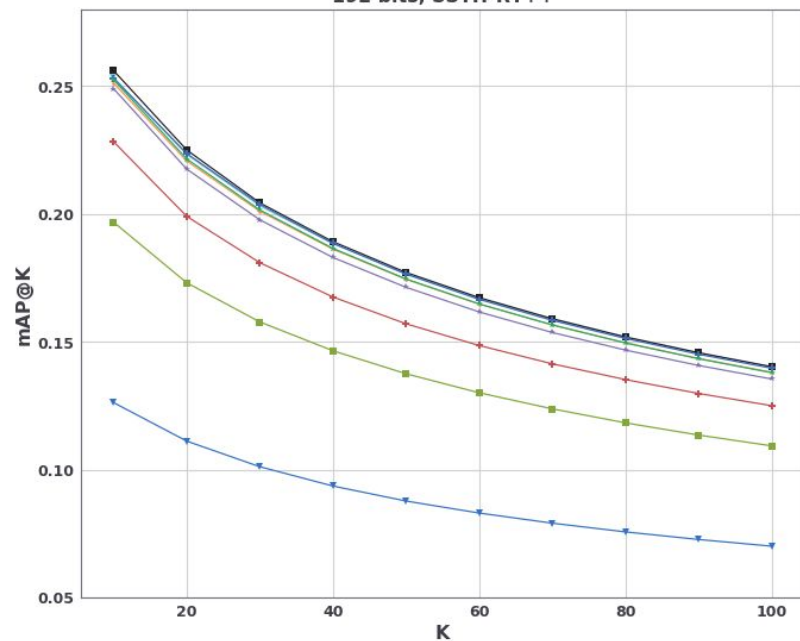

256 bits, SSTH-RT++

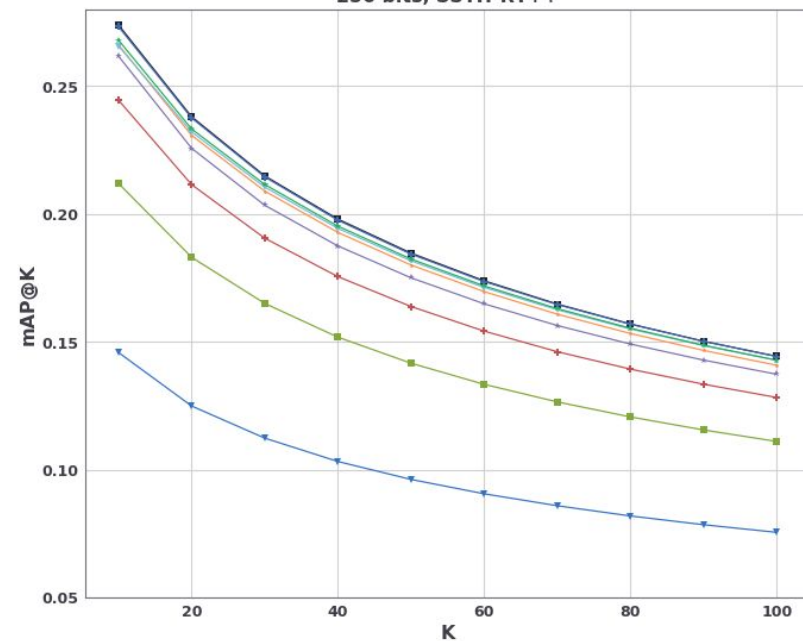

96 bits, LA-RECO

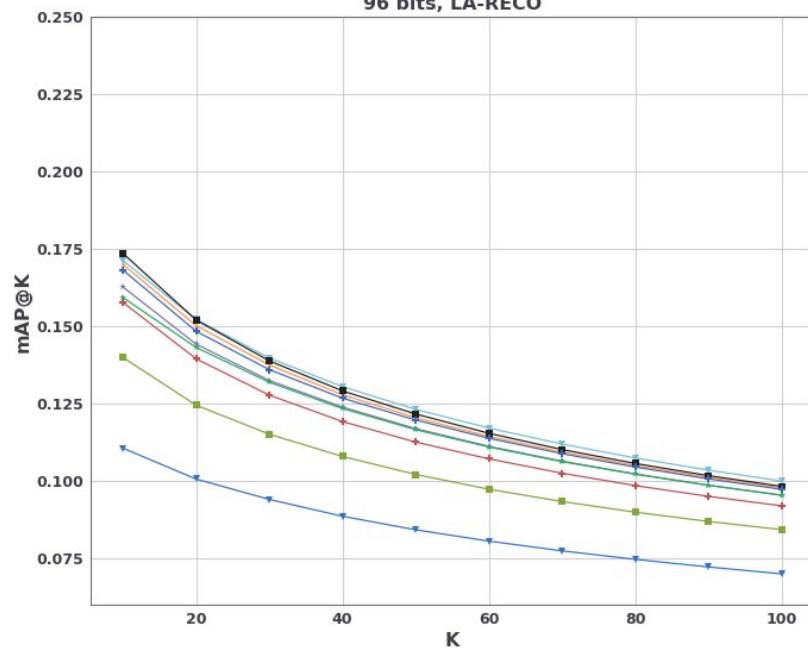

128 bits, LA-RECO

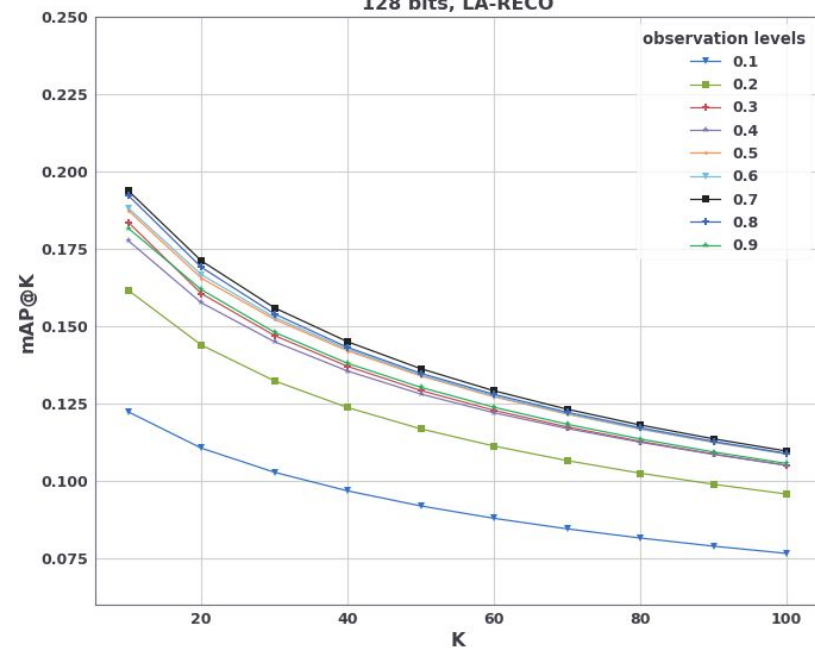

192 bits, LA-RECO

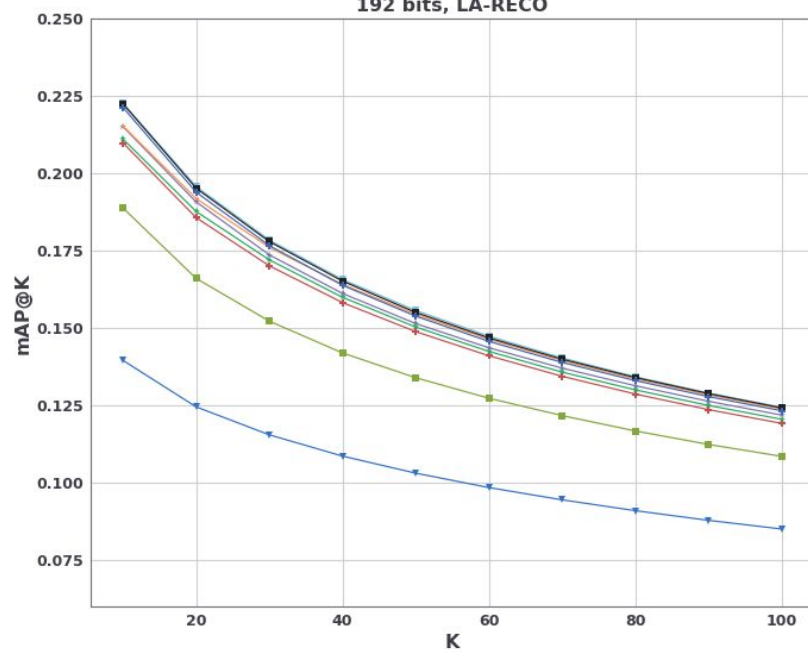

256 bits, LA-RECO

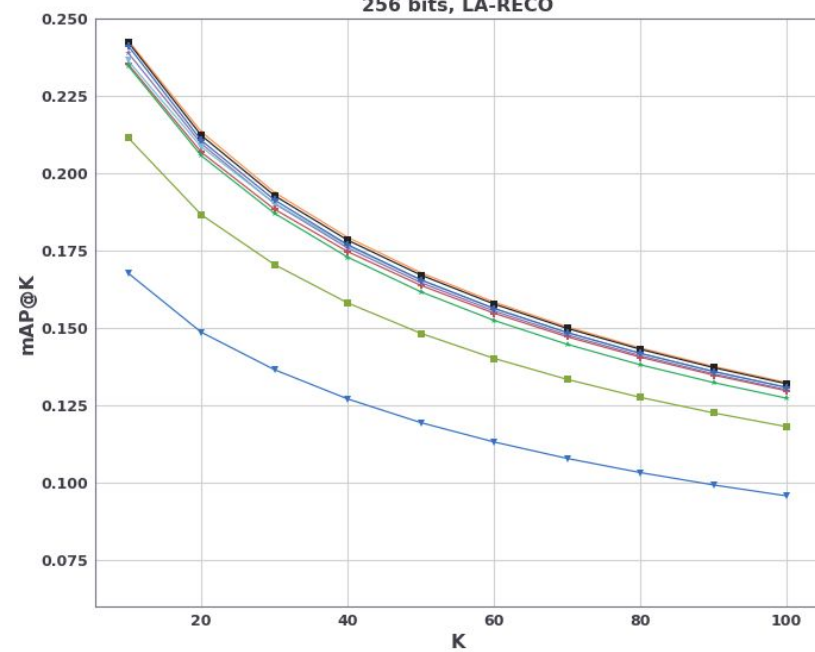

96 bits, LA-CODE

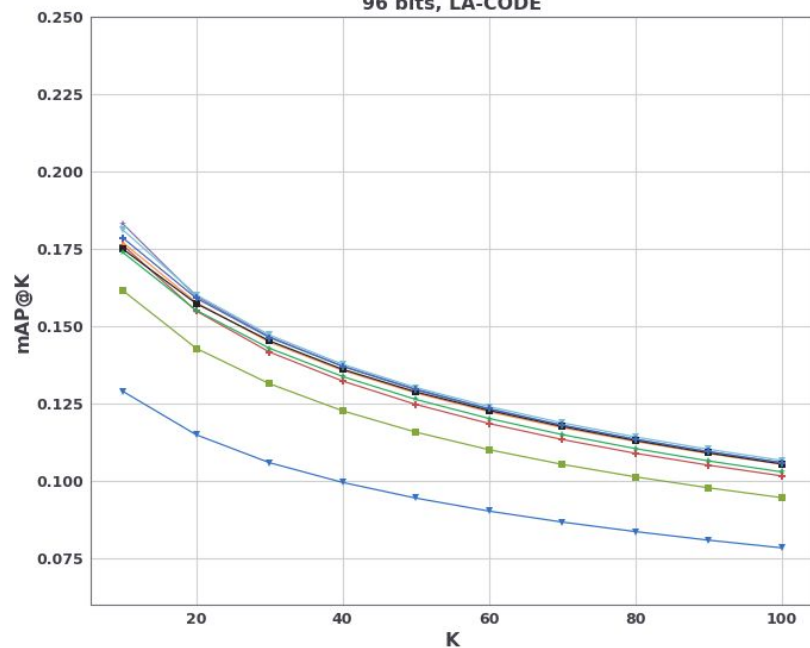

128 bits, LA-CODE

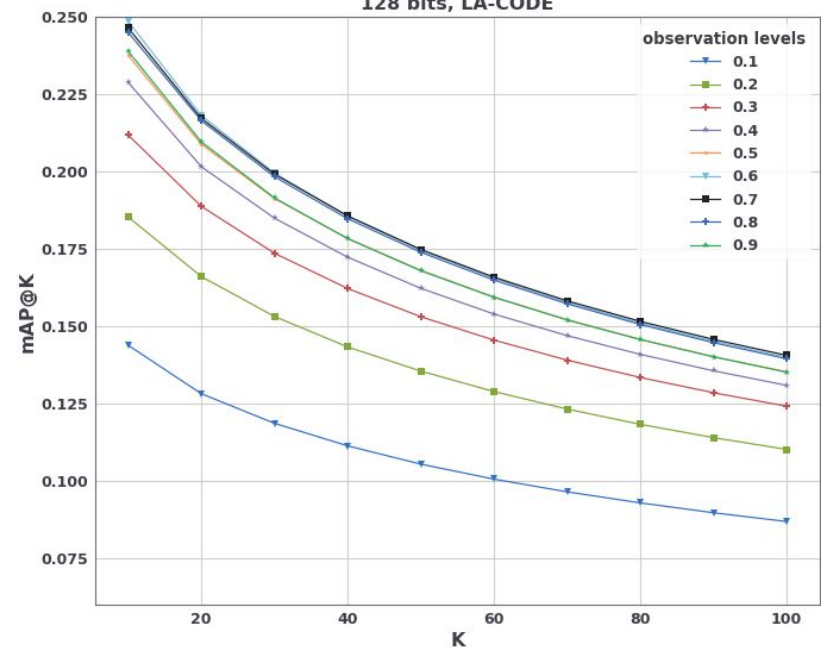

192 bits, LA-CODE

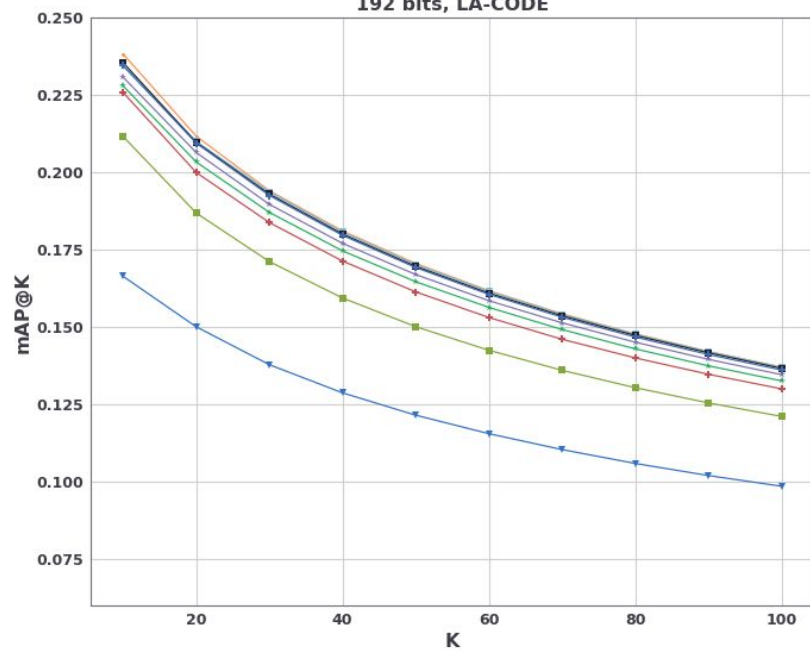

256 bits, LA-CODE

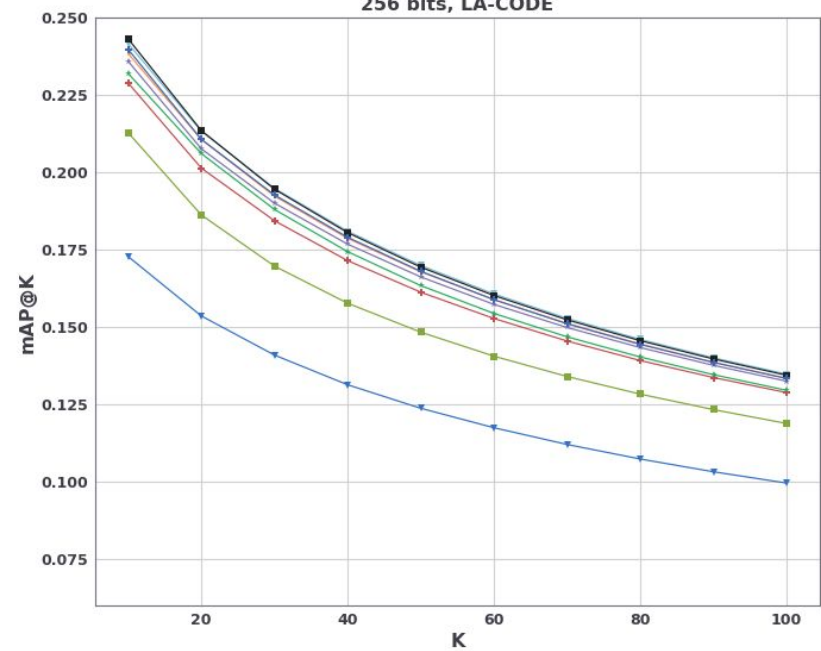

Supplement: Supplementary file 1 [file Yu_Encode_the_Unseen_ACCV_2020_supplemental.zip › 0542_accv_curves.pdf]
