# Supplementary material
Source: ML conference proceedings conference paper supplement (https://openaccess.thecvf.com/content/ACCV2020/html/Yu_Encode_the_Unseen_ACCV_2020_paper.html)
Supplement: Supplementary file 1 [file Yu_Encode_the_Unseen_ACCV_2020_supplemental.zip]

Archive with 2 entries (2 files):
- 0542_accv_curves.pdf
- 0542_accv_video.mp4
